**TITLE:** QUANTITATIVE ASSESSMENT OF THE ANTINOCICEPTIVE EFFECTS OF MIDAZOLAM, AMITRIPTYLINE AND CARBAMAZEPINE ALONE AND IN COMBINATION WITH MORPHINE IN MICE

**AUTHORS:** J-C Liao, Ph.D., K. Liu, M.D., A. E. Takemori, Ph.D.

**AFFILIATION:** Anes. and Pharmacol. Depts., U. of Minnesota, Minneapolis, MN 55455

A number of drugs that are not ordinarily classified as analgesics are used for the management of certain types of chronic pain. They are used often in combination with opioid drugs. Most have effects on the central nervous system such as antianxiety, antidepressant and anticonvulsant drugs, so it is difficult to assess in humans, the contribution made by the emotional component of pain. Thus in this study, a quantitative and objective method such as the measurement of nociceptive thresholds in mice (tail-flick assay) was used to assess the antinociceptive effects of midazolam (MDZ), amitriptyline (AMT) and carbamazepine (CBZ) alone and in combination with morphine (M) to quantify the possible additive or synergistic antinociceptive effect of the combinations of drugs. Experimentally we established

that MDZ, AMT and CBZ were 19.2, 1.1 and 7.8 times, respectively less potent than M ( $ED_{50} = 13.2 \mu\text{mol/kg}$ , s.c.). Thus, when combinations of drugs were studied, the doses that were used to determine the  $ED_{50}$  values of the combinations were kept at a fixed molar ratio of 1 : 19.2 (M : MDZ), 1 : 1.1 (M : AMT), 1 : 7.8 (M : CBZ) and 1 : 7.3 (AMT : CBZ). The theoretical additive  $ED_{50}$  values of these combinations were calculated to be  $133.6 \mu\text{mol/kg}$  (M-MDZ),  $13.6 \mu\text{mol/kg}$  (M-AMT),  $57.9 \mu\text{mol/kg}$  (M-CBZ) and  $58.3 \mu\text{mol/kg}$  (AMT-CBZ). The experimental  $ED_{50}$  values of the combinations were determined to be [ $ED_{50}$  (95% confidence interval)]  $62.7$  ( $49.9 - 77.7$ )  $\mu\text{mol/kg}$  (M-MDZ),  $2.8$  ( $0.9 - 5.6$ )  $\mu\text{mol/kg}$  (M-AMT),  $60.6$  ( $45.4 - 82.0$ )  $\mu\text{mol/kg}$  (M-CBZ), and  $37.8$  ( $31.0 - 47.5$ )  $\mu\text{mol/kg}$  (AMT-CBZ). When the theoretical and experimental  $ED_{50}$  values were compared, it was found that the 95% confidence intervals of the experimental  $ED_{50}$  values did not embrace the theoretical  $ED_{50}$  values of the combinations of M-MDZ, M-AMT and AMT-CBZ and thus one can conclude that these combinations resulted in a synergistic effect. On the other hand, the 95% confidence interval of the experimental  $ED_{50}$  value of the combination of M-CBZ did embrace the theoretical  $ED_{50}$  value so this combination resulted in an additive antinociceptive effect. Therefore, the latter combination may not be as advantageous as the other three combinations when employed for analgesic therapy.

## A754

**TITLE:** SITE OF INTRATHECAL CLONIDINE-INDUCED HYPOTENSION

**AUTHORS:** J.C. Eisenach, M.D.

**AFFILIATION:** Section of Obstetric Anesthesia, Wake Forest University Medical Center, Winston-Salem, NC 27103

**INTRODUCTION:** Intraspinal administration of the  $\alpha_2$ -adrenergic agonist, clonidine, produces analgesia free of side effects common to opioids. Clonidine can, however, decrease blood pressure by actions at several sites. This study examines the effect of the spinal segment of intrathecal injection on hemodynamic effects of clonidine.

**METHODS:** Intrathecal catheters were inserted in 11 ewes via cervical and mid-lumbar laminectomies with catheter tips at cervical ( $C_5$ ), upper thoracic ( $T_5$ ), lower thoracic ( $T_{12}$ ), and lower lumbar ( $L_5$ ) levels. In separate experiments 48 hrs apart, animals received intrathecal injections of clonidine,  $300 \mu\text{g}$  via a cervical, thoracic, or lumbar catheter. Blood pressure and heart rate were continuously monitored for 3 hrs following injection. Data obtained at time of peak hemodynamic effect (10-20 min following injection) were analyzed by one-way ANOVA, with  $P < 0.05$  significant.

**RESULTS:** Clonidine's effect on blood pressure varied with spinal segment of injection ( $P < 0.05$ ), with maximal blood pressure lowering effect following upper thoracic injection (Fig. 1). In contrast, heart rate decreased similarly following clonidine injection at each site.

**DISCUSSION:** Intrathecally injected clonidine

decreases blood pressure in part by inhibiting pre-ganglionic sympathetic neuronal activity. These results are consistent with a predominant spinal sympatholytic action of intrathecally administered clonidine and are similar to results

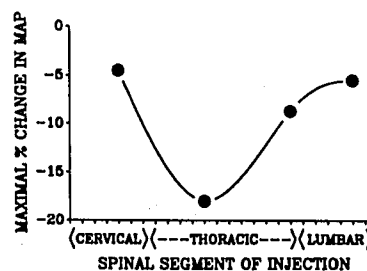

**FIG. 1:** Effect of Spinal Site on Blood Pressure

obtained in rodents, showing peak hemodynamic depression following upper thoracic intrathecal injection of the  $\alpha_2$ -adrenergic agonist, guanabenz.<sup>1</sup> These results also agree with initial clinical experience and provide a rationale for the lack of clonidine-induced hypotension following lumbar injection in obstetric patients.<sup>2</sup>

**REFERENCES:**

1. J Pharmacol Exp Ther 240:298-302, 1987
2. Anesthesiology 71:640-646, 1989.

Supported in part by GM35523.
